# Supplementary material
Source: HighWire-hosted journal article supplement (https://www.jrheum.org/highwire/filestream/38462/field_highwire_adjunct_files/0/200286DataSuppl.pdf)

**A**

Online supplement to: The Ultrasound Score for Erosions (USSe) in the Evaluation of Bone Erosions in Rheumatoid Arthritis Compared To the Modified Sharp/van der Heijde Score for Erosions (SHSe). The Journal of Rheumatology. doi:10.3899/jrheum.200286

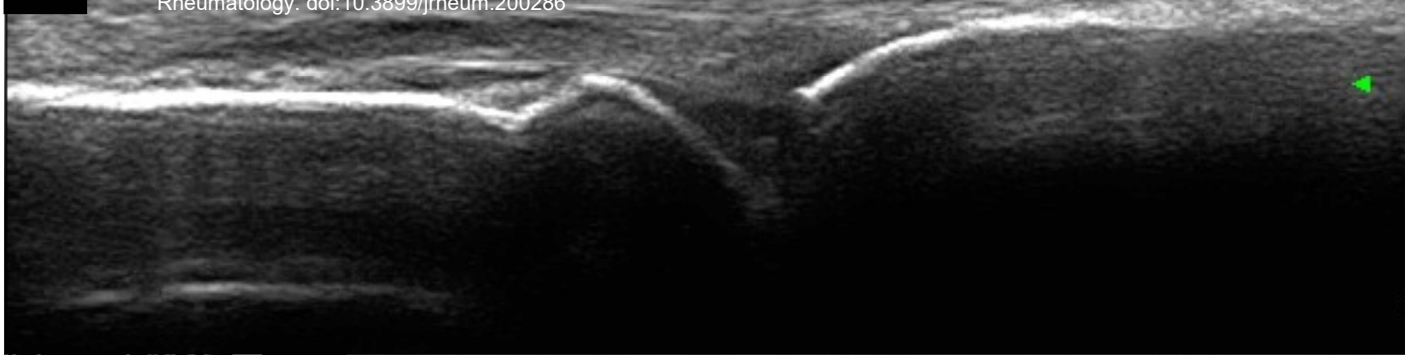**B**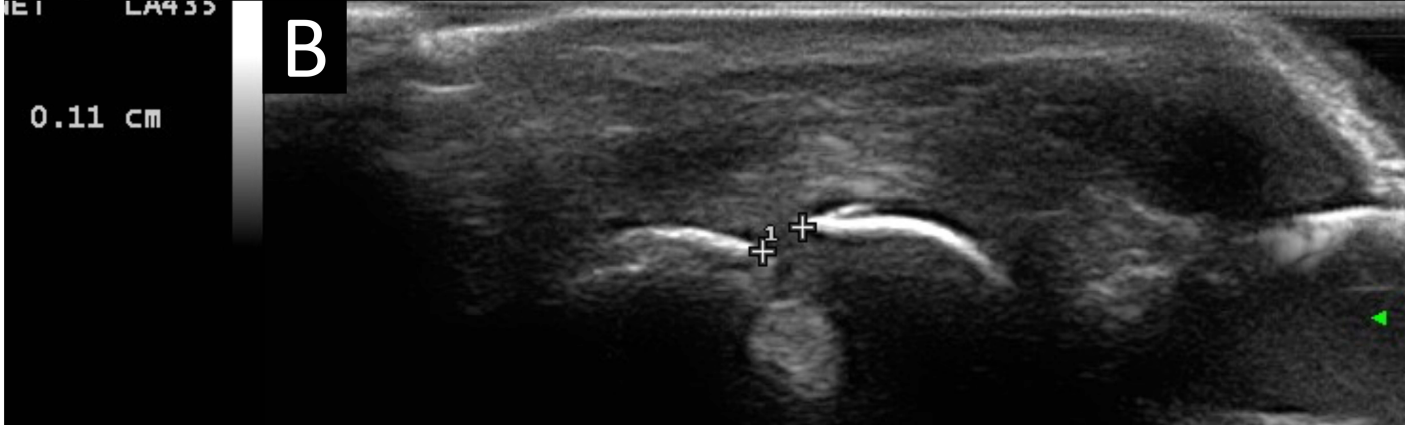**C**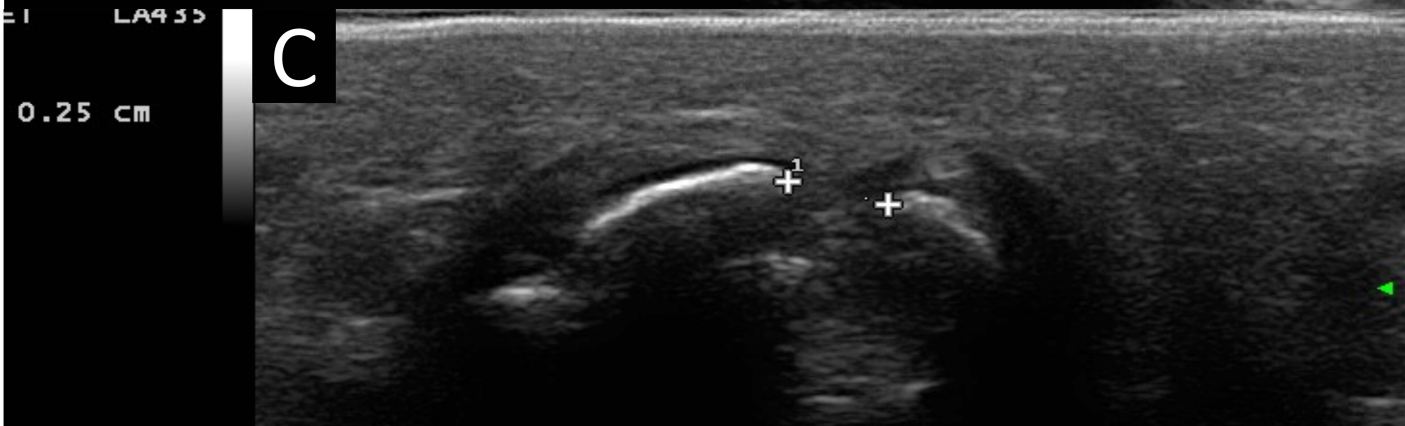**D**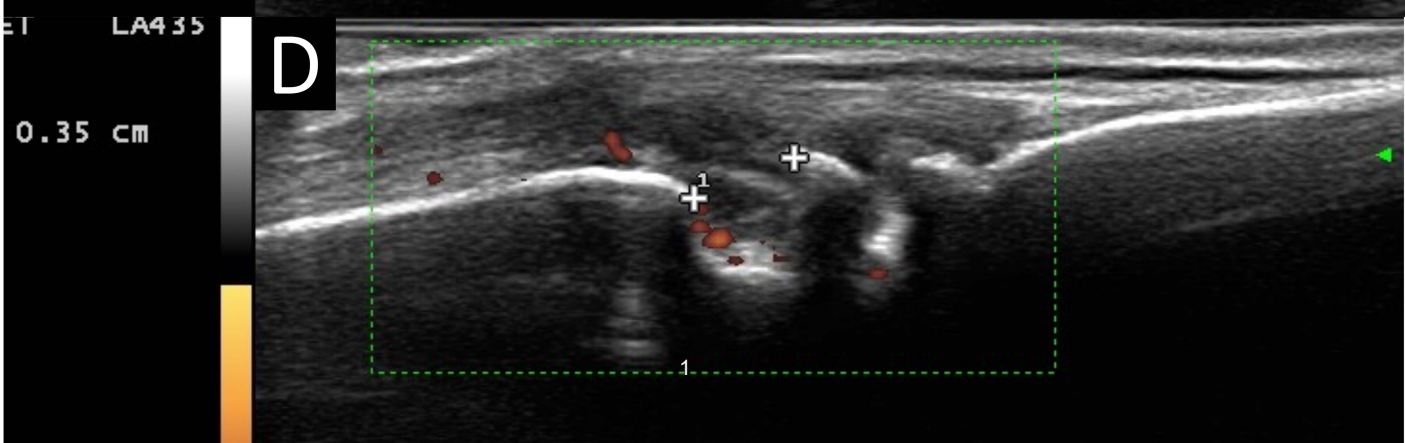

Supplement: 200286DataSuppl.pdf [file 200286DataSuppl.pdf]
